# Supplementary material for: Polymersomes with a smectic liquid crystal structure and AIE fluorescence
Source: Royal Society of Chemistry journal article supplement (doi:10.1039/d1py01686e), 2022-01-01
Supplement: d1py01686e1.pdf [file d1py01686e1.pdf]

## Supporting Information

### Polymersomes with smectic liquid crystal structure and AIE fluorescence

Nian Zhang,<sup>a,†</sup> Yujiao Fan,<sup>a,†</sup> Hui Chen,<sup>a,b</sup> Sylvain Trépout,<sup>c</sup> Annie Brûlet,<sup>d</sup> and Min-Hui Li<sup>\*a</sup>

<sup>a</sup> Chimie ParisTech, PSL Université Paris, CNRS, Institut de Recherche de Chimie Paris, UMR8247, 11 rue Pierre et Marie Curie, 75005 Paris, France.

<sup>b</sup> Beijing Advanced Innovation Center for Soft Matter Science and Engineering, Beijing University of Chemical Technology, 15 North Third Ring Road, Chaoyang District, 100029 Beijing, China.

<sup>c</sup> Institut Curie, Université Paris-Saclay, Inserm US43, CNRS UMS2016, Centre Universitaire, Bât. 101B-110-111-112, Rue Henri Becquerel, CS 90030, 91401 ORSAY Cedex, France.

<sup>d</sup> Laboratoire Léon Brillouin, Université Paris-Saclay, UMR12 CEA-CNRS, CEA Saclay, 91191 Gif sur Yvette cedex, France.

Email : [min-hui.li@chimieparistech.psl.eu](mailto:min-hui.li@chimieparistech.psl.eu)

† These authors contributed equally to this work.

#### 1. Characterizations

##### Nuclear magnetic resonance (NMR)

<sup>1</sup>H NMR and <sup>13</sup>C NMR spectra were recorded on Bruker Avance III HD 400 MHz spectrometer at 298 K. Deuterated chloroform (CDCl<sub>3</sub>) was used as the solvent. NMR chemical shifts were recorded in parts per million referenced to the residual solvent proton ( $\delta = 7.26$  ppm) for <sup>1</sup>H NMR and carbon ( $\delta = 77.1$  ppm) for <sup>13</sup>C NMR.

##### Size exclusion chromatography (SEC)

The number-average molecular weights (M<sub>n</sub>) and molecular weight distributions of polymers (polydispersity index, *D*) were evaluated by size exclusion chromatography (SEC), using Agilent 1260 Infinity Series GPC (ResiPore 3  $\mu$ m, 300  $\times$  7.5 mm, 1.0 mL/min, UV (250 nm) and refractive index (RI, PLGPC 220) detector. All measurements were performed with THF as the eluent at a flow rate of 1.0 mL/min at 35 °C. Monodisperse polystyrene polymers were used as calibration standards.

### **Small-angle X-ray scattering (SAXS)**

SAXS experiments were carried out on the Xeuss 2.0 apparatus of Laboratoire Léon Brillouin installed in the SWAXS Lab (CEA Saclay, France). The instrument uses a micro-focused Cu K $\alpha$  source (wavelength of 1.54 Å, 8 keV) and a Pilatus3 1M detector (Dectris, Switzerland). One configuration was chosen to cover the broad q range, from 0.09 to 4 nm<sup>-1</sup>, with the sample to detector distance set to 1.18m. The sample is a fiber drawn by hand with a needle from a molten copolymer at a temperature just below the isotropic-liquid crystal phase.

### **Polarizing optical microscopy (POM) and differential scanning calorimetry (DSC)**

The mesomorphic properties were studied by thermal optical polarizing microscopy using a Leitz Ortholux microscope equipped with a Mettler FP82 hot stage, and differential scanning calorimetry using a Perkin-Elmer DSC7 at the heating and cooling rates of 10 °C min<sup>-1</sup>.

### **Fluorescence emission spectroscopy**

The fluorescence emission spectroscopy characterization was carried out on a FluoroMax spectrofluorometer. Samples were added to a 1cm quartz cuvette with all flanks transparent.

### **Ultraviolet–visible spectroscopy (UV-Vis)**

UV-vis absorption spectra were measured on a Milton Ray Spectronic 3000 Array spectrophotometer. Photoluminescence (PL) spectra were recorded on a PerkinElmer LS55 and Spex FluoroMax Spectrofluorometer.

### **Dynamic light scattering (DLS)**

Hydrodynamic diameters ( $D_h$ ) of the self-assemblies and their size distributions in deionized water were measured at 25 °C by dynamic light scattering (DLS, Malvern zetasizer 3000HS, UK) with a 633 nm laser. All measurements were performed with a 90° scattering angle. The sample solution in the scattering cell was equilibrated for 10 min before measurement.

### **Scanning electron microscopy (SEM)**

SEM observations were performed on a Zeiss Leo 1530 FEG-SEM at 10kV. SEM samples were prepared by dropping a drop of the aggregate dispersions onto silicon wafers, followed by freeze-drying or vacuum drying for 3 hours. Before dropping the samples, the silicon wafers were hydrophilized in a bath of 100 mL mixture (70% H<sub>2</sub>SO<sub>4</sub>: 30% H<sub>2</sub>O<sub>2</sub>) and then and then cleaned by 20 mL Milli-Q water, Acetone and Ethanol at room temperature respectively. The silicon surface was then dried with liquid nitrogen before use.

## Cryo-electron microscopy (Cryo-EM)

Morphologies of the copolymer colloids were characterized by cryo-EM. Images were acquired on a JEOL 2200FS energy-filtered (20 eV) field emission gun electron microscopy operating at 200 kV using a Gatan ssCCD 2048 × 2048 pixels. Samples were prepared by deposition of 5  $\mu\text{L}$  sample solution onto a 200-mesh holey carbon copper grid (Ted Pella Inc., U.S.A.) and the samples were flash-frozen in liquid ethane cooled down at liquid nitrogen.

## 2. Synthesis of AChol monomer and mPEG-TPE-CTA

The synthesis of AChol monomer was according to the reported procedures.<sup>1</sup> As shown in Figure S1, AChol was synthesized by a one-step reaction between 2-hydroxyethyl acrylate and cholesteryl chloroformate using pyridine as the acid-binding agent. After purification by column chromatography with chloroform and *n*-hexane as the eluents, pure AChol was obtained with a yield of about 72%. AChol has been characterized carefully by NMR. Its <sup>1</sup>H NMR and <sup>13</sup>C NMR spectra are shown in Figure S2. All the NMR signals could be assigned to the corresponding protons or carbons of AChol, indicating that pure AChol was prepared.

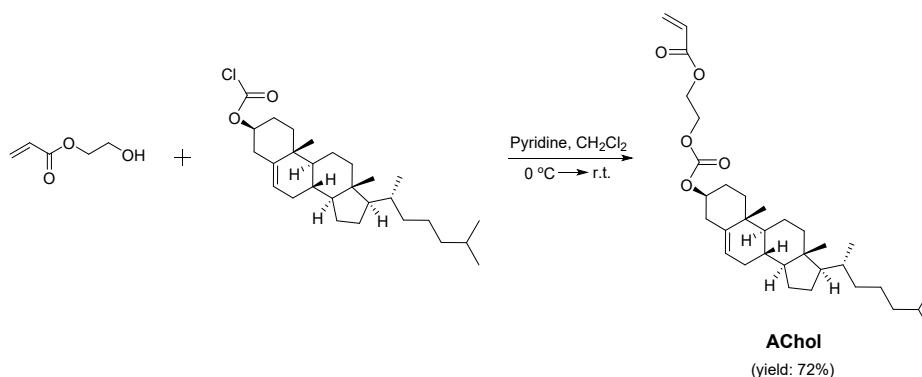

**Figure S1.** Synthetic route to AChol monomer.

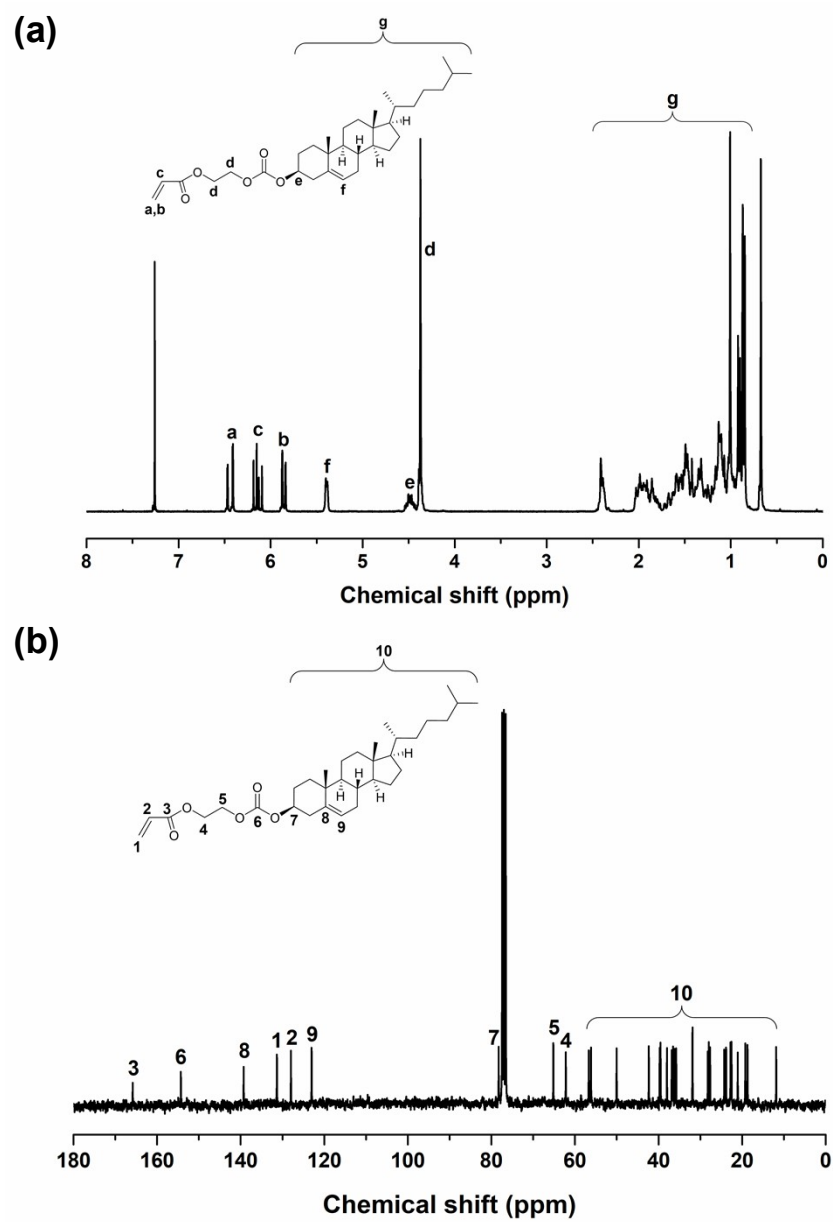

Figure S2.  $^1\text{H}$  NMR and  $^{13}\text{C}$  NMR spectra of AChol.  $\text{CDCl}_3$ , 400 MHz, 297 K.

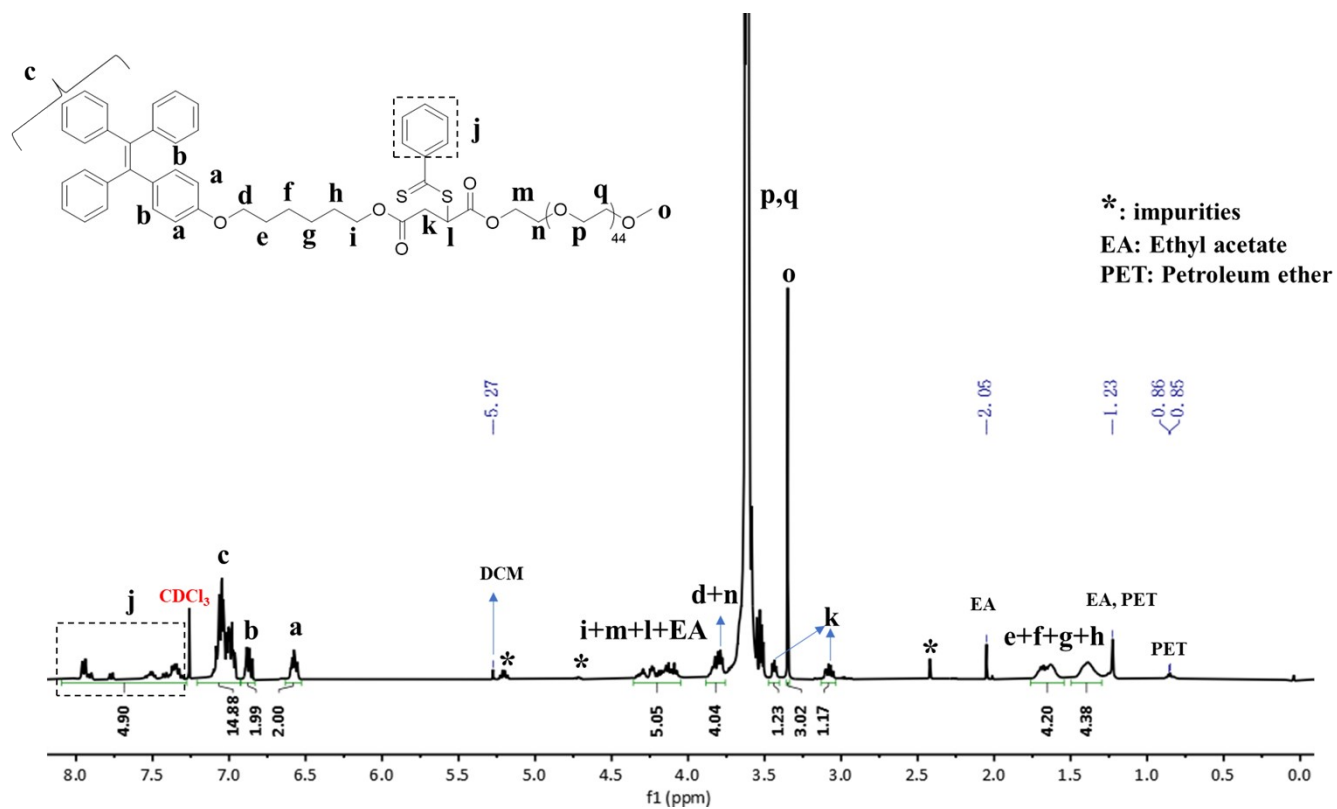

Figure S3. <sup>1</sup>H NMR spectrum of mPEG-TPE-CTA. CDCl<sub>3</sub>, 400 MHz, 297 K.

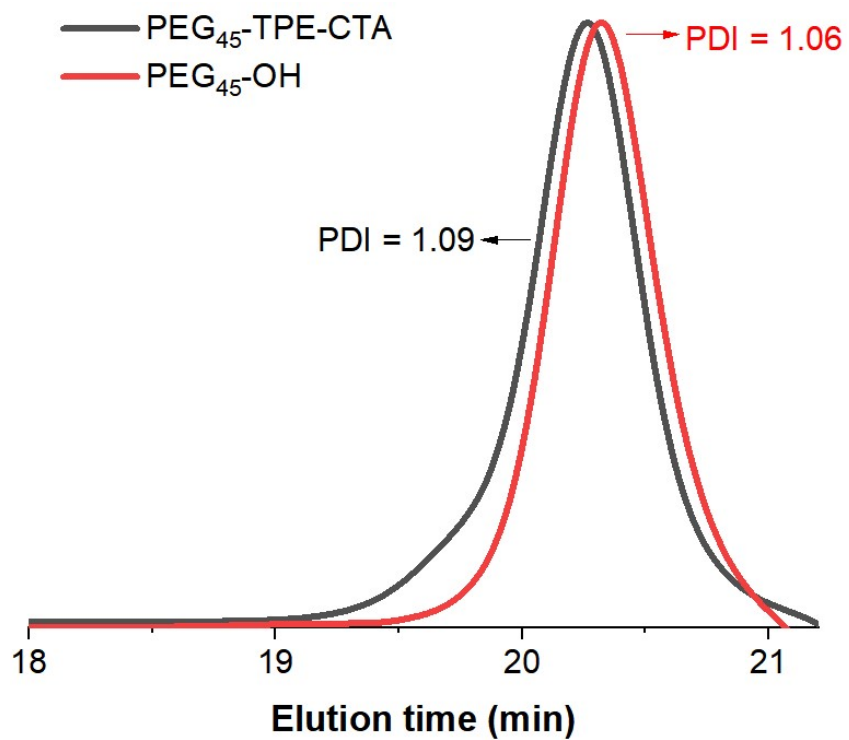

Figure S4. GPC traces of mPEG-OH and mPEG-TPE-CTA with THF as the eluent.

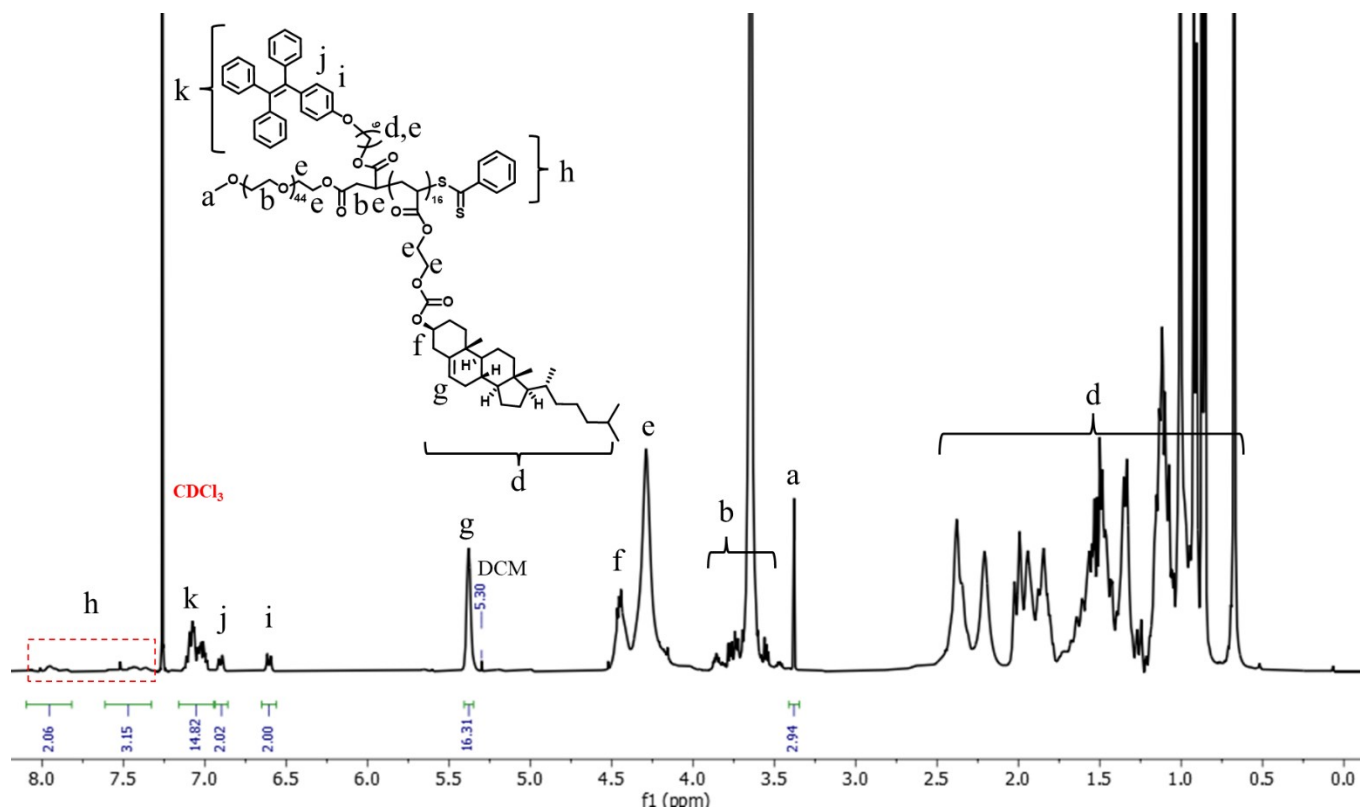

**Figure S5.** <sup>1</sup>H NMR spectrum of PEG<sub>45</sub>-TPE-*b*-PACHol<sub>16</sub> copolymer. CDCl<sub>3</sub>, 400 MHz, 297 K.

**Table S1.** Synthesis of LC amphiphilic PEG-TPE-*b*-PACHol diblock copolymer.<sup>a</sup>

| Sample                                                 | [AChol]/<br>[mPEG-TPE-CTA]/[AIBN] <sup>b</sup> | Yield <sup>c</sup> |
|--------------------------------------------------------|------------------------------------------------|--------------------|
| PEG <sub>45</sub> -TPE- <i>b</i> -PACHol <sub>11</sub> | 5:1:0.2                                        | 57%                |
| PEG <sub>45</sub> -TPE- <i>b</i> -PACHol <sub>14</sub> | 7:1:0.2                                        | 64%                |
| PEG <sub>45</sub> -TPE- <i>b</i> -PACHol <sub>16</sub> | 10:1:0.2                                       | 67%                |
| PEG <sub>45</sub> -TPE- <i>b</i> -PACHol <sub>22</sub> | 15:1:0.2                                       | 76%                |
| PEG <sub>45</sub> -TPE- <i>b</i> -PACHol <sub>43</sub> | 30:1:0.2                                       | 51%                |

- All the polymerization trials were performed using mPEG-TPE-CTA ( $M_{n,NMR} = 2680$  Da,  $D = 1.16$ ) as the chain transfer agent in 1,4-dioxane at 80 °C; polymerization time: 24 h; concentration of mPEG-TPE-CTA: 0.028 M.
- Molar ratio.
- Degree of polymerization (DP),  $M_n$  and yield were calculated by <sup>1</sup>H NMR.

### 3. Supplementary data of liquid crystal properties of PEG<sub>45</sub>-TPE-*b*-PACHol<sub>n</sub> (n =11, 14, 16)

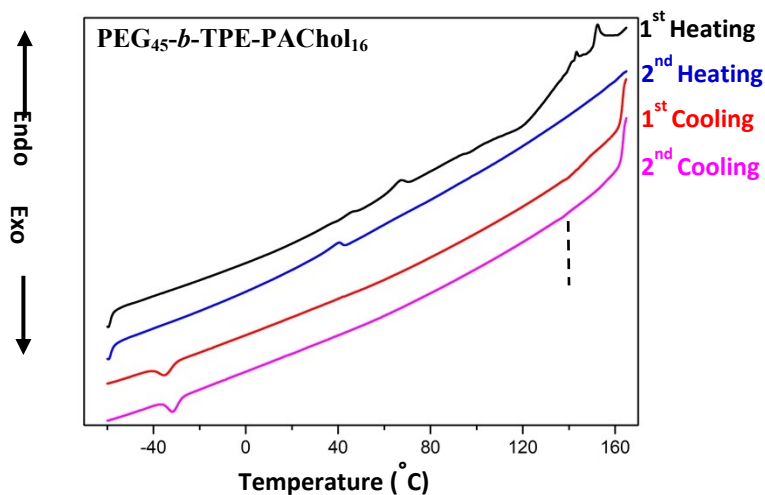

**Figure S6.** The DCS curves of PEG<sub>45</sub>-TPE-*b*-PACHol<sub>16</sub>. The scan rate was  $\pm 10$  °C/min. The vertical dotted line indicates the smectic-isotropic (SmA-I) transition position of the hydrophobic block PACHol<sub>16</sub>.

**Table S2.** Phase transition temperatures of PEG<sub>45</sub>-TPE-*b*-PACHol<sub>16</sub> obtained by DSC ( $\pm 10$  °C/min)

| Process                 | PEG<br>Melting ( $T_m$ ) or<br>Recrystallization<br>( $T_{cr}$ ) | PACHol <sub>16</sub><br>SmA-I | PACHol <sub>16</sub><br>$T_g$ | PACHol <sub>16</sub><br>melting   |
|-------------------------|------------------------------------------------------------------|-------------------------------|-------------------------------|-----------------------------------|
| 1 <sup>st</sup> Heating | 45.7 °C<br>(0.58 J/g)                                            |                               | 66.9 °C<br>(2.25 J/g)         | 143.2 °C, 152.4 °C<br>(24.58 J/g) |
| 1 <sup>st</sup> Cooling | -34.7 °C<br>(-3.66 J/g)                                          | 139.8 °C<br>(-0.11 J/g)       |                               | --                                |
| 2 <sup>nd</sup> Heating | 40.2 °C<br>(0.79 J/g)                                            | <i>Signal too flat</i>        |                               | --                                |
| 2 <sup>nd</sup> Cooling | -31.5 °C<br>(-4.00 J/g)                                          | 137.0 °C<br>(-0.11 J/g)       |                               | --                                |

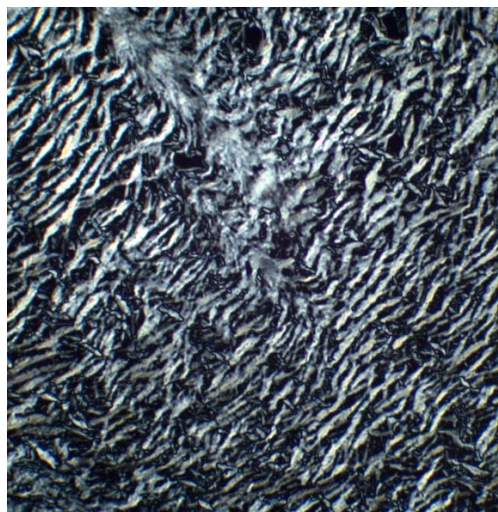

**Figure S7.** POM textures of PEG<sub>45</sub>-TPE-*b*-PACHol<sub>16</sub> at 25°C.

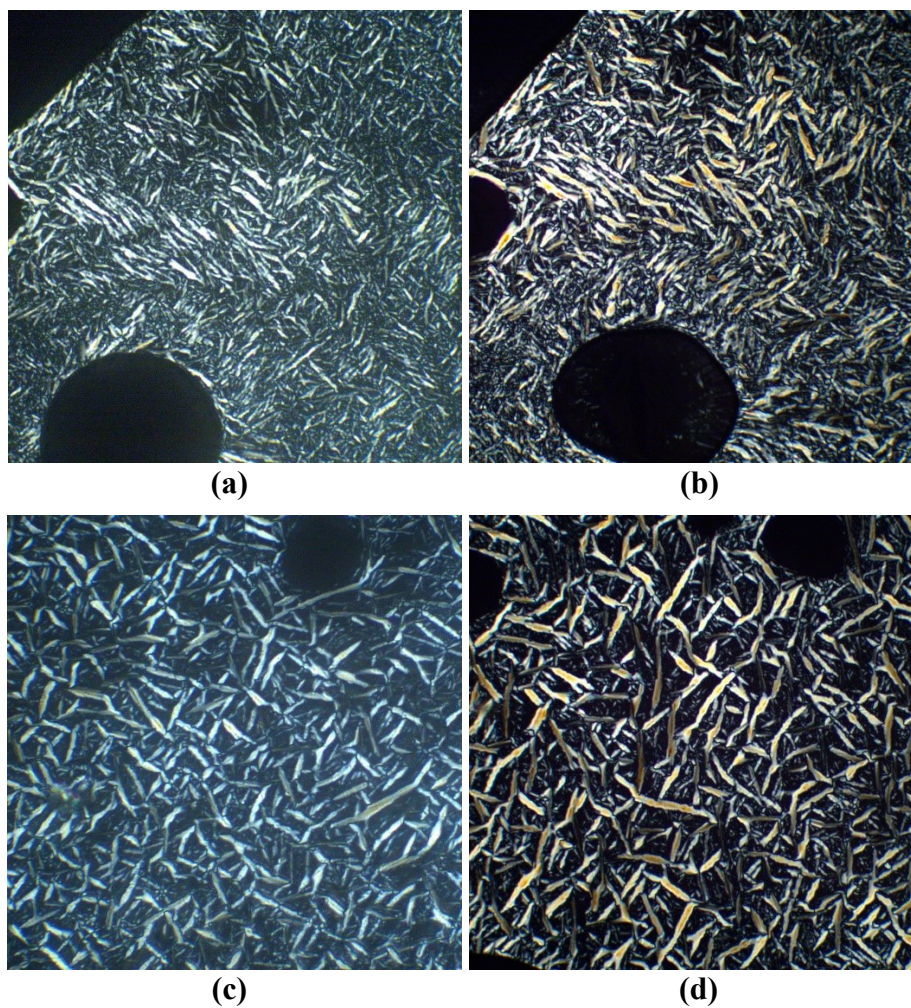

**Figure S8.** POM textures of PEG<sub>45</sub>-TPE-*b*-PACHol<sub>n</sub>. (a-b) n = 14 at 120°C (a) and 25°C (b). (c-d) n = 11 at 117°C (c) and 25°C (d).



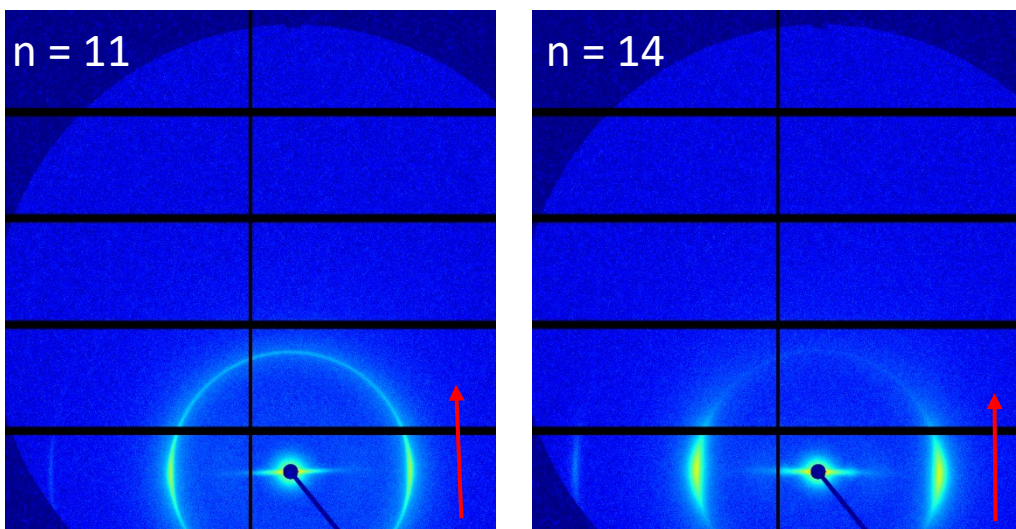

**Figure S9.** SAXS of PEG<sub>45</sub>-TPE-*b*-PACHol<sub>n</sub> (n = 11 left, n = 14 right) at 25°C. The red arrow indicates the fiber drawing direction.

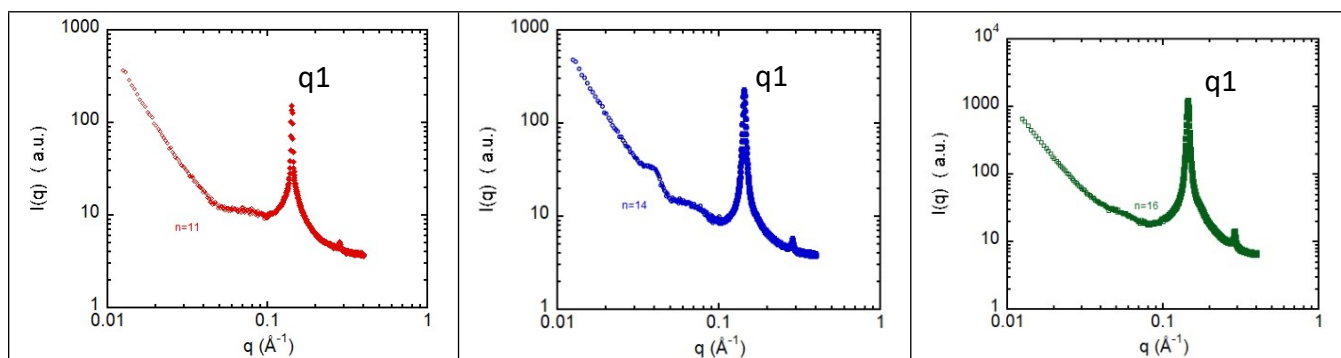

|        | Low q peak      | Low q Bump      | q1              |            | q2              |            |
|--------|-----------------|-----------------|-----------------|------------|-----------------|------------|
|        | Å <sup>-1</sup> | Å <sup>-1</sup> | Å <sup>-1</sup> | d (nm)     | Å <sup>-1</sup> | q2/q1      |
| n = 11 |                 | 0.69            | 0.1419          | 4.42789288 | 0.283           | 1.99436223 |
| n = 14 | 0.040           | 0.63            | 0.1429          | 4.39690693 | 0.2861          | 2.00209937 |
| n = 16 |                 | 0.57            | 0.1447          | 4.34221147 | 0.2878          | 1.98894264 |

**Figure S10.** Data analyses of SAXS of PEG<sub>45</sub>-TPE-*b*-PACHol<sub>n</sub> (n = 11, 14, 16) at 25°C. q1 and q2 correspond to the signals of aligned smectic A phase. Low q bump and peak correspond the microphase separation of PEG and PACHol blocks (bump signals give lengths of about 9nm, 10nm and 11nm for n = 11, 14 and 16, respectively).

#### 4. Supplementary data of self-assembly of PEG<sub>45</sub>-TPE-*b*-PACHol<sub>16</sub>

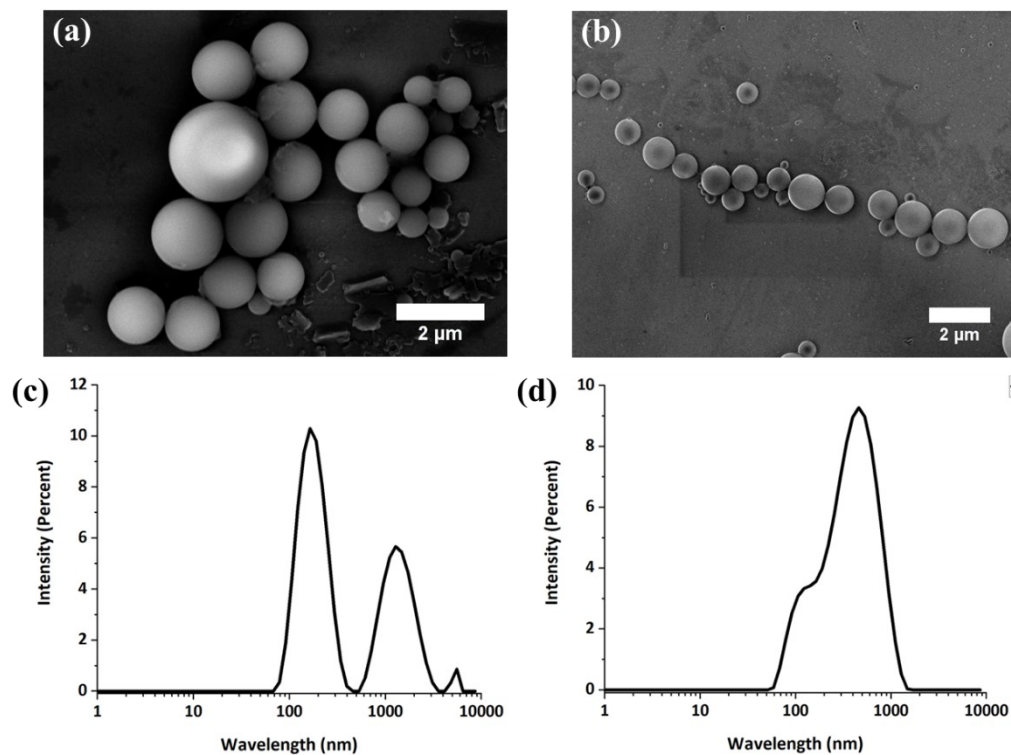

**Figure S11.** Supplemental SEM images of the self-assemblies formed from the diblock copolymer PEG<sub>45</sub>-TPE-*b*-PACHol<sub>16</sub> in THF/water system at a concentration of 2 mg/mL (a) and of 1mg/mL (b), and their intensity profile of size distribution by DLS at 2 mg/mL (c) and of 1mg/mL (d).

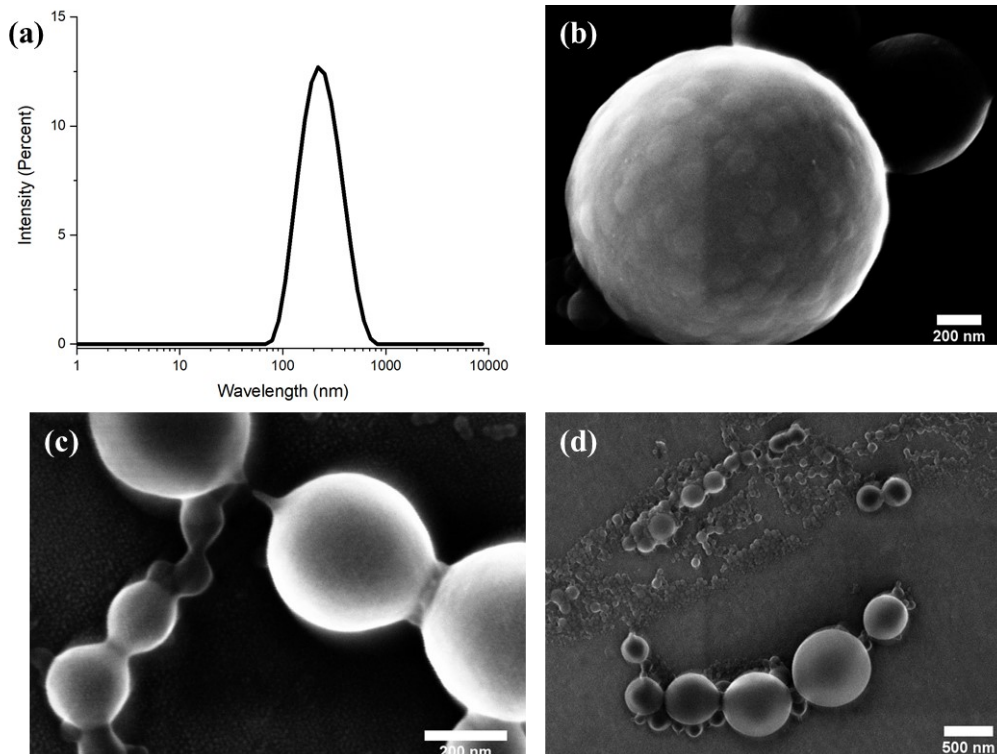

**Figure S12.** The DLS profile (a) and SEM pictures (b-d) of the self-assemblies formed from the diblock copolymer PEG<sub>45</sub>-TPE-*b*-PACHol<sub>16</sub> in THF/water system at a concentration of 10 mg/mL.

## 5. Fluorescence quantum yield measurement

Quantum yield of the AIE polymersomers in aqueous solution were obtained by comparing the integrated fluorescence spectra of the self-assembly solution with the fluorescence spectrum of a standard fluorogen, 9,10-diphenylanthracene, in ethanol (excitation wavelength: 355 nm) with corrections of refractive index differences using equation:<sup>2</sup>

$$\phi_2 = \phi_1 \times \frac{n_2^2}{n_1^2} \times \frac{F_2}{F_1} \times \frac{A_1}{A_2}$$

$\phi_2$  is the quantum yield of the sample to be measured;  $\phi_1$  is the quantum yield of a standard sample;  $n_1$  and  $n_2$  are the refractive indexes of the standard solution and of sample solution, respectively;  $F_1$  and  $F_2$  are the integral areas of emission intensities in the fluorescence spectra of the standard and sample solution, respectively;  $A_1$  and  $A_2$  are the absorption intensity of standard and sample solution respectively, which are kept lower than 0.05. Here, the refractive index of ethanol is  $n_1 = 1.366$  and that of water is  $n_2 = 1.333$  at room temperature. The quantum yield of 9,10-diphenylanthracene is 0.96 in ethanol at room

temperature (1  $\mu\text{g/mL}$ ;  $\lambda_{\text{ex}} = 355 \text{ nm}$ ).

## References

1. Piñol, R.; Jia, L.; Gubellini, F.; Lévy, D.; Albouy, P.-A.; Keller, P.; Cao, A.; Li, M.-H. *Macromolecules* **2007**, *40*, 5625-5627.
2. Lu, H.; Su, F.; Mei, Q.; Tian, Y.; Tian, W.; Johnson, R. H.; Meldrum, D. R. *J. Mater. Chem.* **2012**, *22*, 9890-9900.
